# Supplementary material for: A Bayesian Model of Category-Specific Emotional Brain Responses
Source: PubMed Central journal article supplement (PMC4390279; doi:10.1371/journal.pcbi.1004066), 2015-04-08
Supplement: pcbi.1004066.s002.pdf [file pcbi.1004066.s002.pdf]

**Table S1: Confusion matrices****Bayesian Spatial Point Process Model**

|                | <b>Anger</b> | <b>Disgust</b> | <b>Fear</b>  | <b>Happy</b> | <b>Sad</b>   |
|----------------|--------------|----------------|--------------|--------------|--------------|
| <b>Anger</b>   | <b>0.43*</b> | 0.07           | 0.28         | 0.15         | 0.08         |
| <b>Disgust</b> | 0.03         | <b>0.76*</b>   | 0.08         | 0.08         | 0.06         |
| <b>Fear</b>    | 0.02         | 0.04           | <b>0.86*</b> | 0.06         | 0.03         |
| <b>Happy</b>   | 0.00         | 0.07           | 0.23         | <b>0.58*</b> | 0.11         |
| <b>Sad</b>     | 0.00         | 0.07           | 0.20         | 0.09         | <b>0.65*</b> |

**Average accuracy is 0.66****Naïve Bayes Classifier**

|                | <b>Anger</b> | <b>Disgust</b> | <b>Fear</b>  | <b>Happy</b> | <b>Sad</b>  |
|----------------|--------------|----------------|--------------|--------------|-------------|
| <b>Anger</b>   | <b>0.17</b>  | 0.11           | 0.51         | 0.12         | 0.09        |
| <b>Disgust</b> | 0.13         | <b>0.37*</b>   | 0.36         | 0.05         | 0.09        |
| <b>Fear</b>    | 0.05         | 0.09           | <b>0.73*</b> | 0.04         | 0.08        |
| <b>Happy</b>   | 0.09         | 0.12           | 0.43         | <b>0.23</b>  | 0.13        |
| <b>Sad</b>     | 0.11         | 0.11           | 0.42         | 0.10         | <b>0.25</b> |

**Average accuracy is 0.35****Support vector machine classifier**

|                | <b>Anger</b> | <b>Disgust</b> | <b>Fear</b>  | <b>Happy</b> | <b>Sad</b>  |
|----------------|--------------|----------------|--------------|--------------|-------------|
| <b>Anger</b>   | <b>0.28</b>  | 0.14           | 0.28         | 0.19         | 0.12        |
| <b>Disgust</b> | 0.16         | <b>0.32*</b>   | 0.17         | 0.16         | 0.19        |
| <b>Fear</b>    | 0.13         | 0.09           | <b>0.51*</b> | 0.12         | 0.14        |
| <b>Happy</b>   | 0.18         | 0.16           | 0.26         | <b>0.23</b>  | 0.17        |
| <b>Sad</b>     | 0.23         | 0.11           | 0.22         | 0.14         | <b>0.31</b> |

**Average accuracy is 0.33****Bayesian Spatial Point Process Model controlling for Induction Method**

|                | <b>Anger</b> | <b>Disgust</b> | <b>Fear</b>  | <b>Happy</b> | <b>Sad</b>   |
|----------------|--------------|----------------|--------------|--------------|--------------|
| <b>Anger</b>   | <b>0.40*</b> | 0.11           | 0.29         | 0.13         | 0.07         |
| <b>Disgust</b> | 0.03         | <b>0.72*</b>   | 0.08         | 0.09         | 0.09         |
| <b>Fear</b>    | 0.03         | 0.03           | <b>0.83*</b> | 0.07         | 0.04         |
| <b>Happy</b>   | 0.00         | 0.13           | 0.23         | <b>0.49*</b> | 0.15         |
| <b>Sad</b>     | 0.00         | 0.07           | 0.23         | 0.09         | <b>0.62*</b> |

**Average accuracy is 0.61**
