# Supplementary material for: A Bayesian Model of Category-Specific Emotional Brain Responses
Source: PubMed Central journal article supplement (PMC4390279; doi:10.1371/journal.pcbi.1004066), 2015-04-08
Supplement: pcbi.1004066.s003.pdf [file pcbi.1004066.s003.pdf]

Supplementary Table S2. Emotion classification based on methodological variables

Emotion elicitation method

|         | Anger       | Disgust     | Fear        | Sad         | Happy       |
|---------|-------------|-------------|-------------|-------------|-------------|
| Anger   | <b>0.01</b> | 0.00        | 0.70        | 0.29        | 0.00        |
| Disgust | 0.04        | <b>0.00</b> | 0.83        | 0.13        | 0.00        |
| Fear    | 0.00        | 0.00        | <b>0.90</b> | 0.10        | 0.00        |
| Sad     | 0.09        | 0.02        | 0.49        | <b>0.29</b> | 0.11        |
| Happy   | 0.00        | 0.00        | 0.70        | 0.30        | <b>0.00</b> |

Average accuracy:

**0.24 n.s.**

Imaging technique (PET or fMRI)

|         | Anger       | Disgust     | Fear        | Sad         | Happy       |
|---------|-------------|-------------|-------------|-------------|-------------|
| Anger   | <b>0.00</b> | 0.78        | 0.00        | 0.22        | 0.00        |
| Disgust | 0.00        | <b>0.94</b> | 0.00        | 0.06        | 0.00        |
| Fear    | 0.00        | 0.94        | <b>0.00</b> | 0.06        | 0.00        |
| Sad     | 0.00        | 0.63        | 0.00        | <b>0.37</b> | 0.00        |
| Happy   | 0.00        | 0.73        | 0.00        | 0.27        | <b>0.00</b> |

Average accuracy:

**0.26 p < .05**

Stimulus type

|         | Anger       | Disgust     | Fear        | Sad         | Happy       |
|---------|-------------|-------------|-------------|-------------|-------------|
| Anger   | <b>0.06</b> | 0.04        | 0.65        | 0.25        | 0.00        |
| Disgust | 0.07        | <b>0.33</b> | 0.42        | 0.17        | 0.00        |
| Fear    | 0.05        | 0.15        | <b>0.68</b> | 0.07        | 0.04        |
| Sad     | 0.02        | 0.11        | 0.29        | <b>0.51</b> | 0.08        |
| Happy   | 0.00        | 0.05        | 0.62        | 0.32        | <b>0.00</b> |

Average accuracy:

**0.32 p < .05**

Participant sex

|         | Anger       | Disgust     | Fear        | Sad         | Happy       |
|---------|-------------|-------------|-------------|-------------|-------------|
| Anger   | <b>0.83</b> | 0.00        | 0.13        | 0.04        | 0.00        |
| Disgust | 0.55        | <b>0.00</b> | 0.16        | 0.29        | 0.00        |
| Fear    | 0.69        | 0.00        | <b>0.23</b> | 0.08        | 0.00        |
| Sad     | 0.55        | 0.29        | 0.15        | <b>0.00</b> | 0.00        |
| Happy   | 0.66        | 0.00        | 0.17        | 0.17        | <b>0.00</b> |

Average accuracy:

**0.21 n.s.**

Task Type

|         | Anger       | Disgust     | Fear        | Sad         | Happy       |
|---------|-------------|-------------|-------------|-------------|-------------|
| Anger   | <b>0.00</b> | 0.29        | 0.32        | 0.09        | 0.30        |
| Disgust | 0.00        | <b>0.49</b> | 0.28        | 0.07        | 0.16        |
| Fear    | 0.00        | 0.29        | <b>0.44</b> | 0.02        | 0.25        |
| Sad     | 0.00        | 0.29        | 0.17        | <b>0.38</b> | 0.15        |
| Happy   | 0.31        | 0.32        | 0.21        | 0.16        | <b>0.00</b> |

Average accuracy:

**0.26 p < .05**

Comparison (control) condition

|         | Anger       | Disgust     | Fear        | Sad         | Happy       |
|---------|-------------|-------------|-------------|-------------|-------------|
| Anger   | <b>0.00</b> | 0.20        | 0.70        | 0.06        | 0.04        |
| Disgust | 0.00        | <b>0.00</b> | 0.68        | 0.00        | 0.32        |
| Fear    | 0.00        | 0.20        | <b>0.75</b> | 0.01        | 0.04        |
| Sad     | 0.00        | 0.14        | 0.71        | <b>0.14</b> | 0.02        |
| Happy   | 0.05        | 0.29        | 0.57        | 0.09        | <b>0.00</b> |

Average accuracy:

**0.18 n.s.**

Note. Confusion matrices for six methods-related variables. Rows are true emotion categories, and columns are brain-based predicted categories. Numbers are proportions (range 0-1). \*: p < .05.
