# Supplementary material for: A Bayesian Model of Category-Specific Emotional Brain Responses
Source: PubMed Central journal article supplement (PMC4390279; doi:10.1371/journal.pcbi.1004066), 2015-04-08
Supplement: pcbi.1004066.s004.pdf [file pcbi.1004066.s004.pdf]

Supplementary Table S3. Emotion classification based on methodological variables

Overall intensity across zone (FDR  $q < .05$  :  $p = 0.0022$ )

| Region group         | ang-dis | ang-fea | ang-hap | ang-sad | dis-fea | dis-hap | dis-sad | fea-hap | fea-sad | hap-sad |
|----------------------|---------|---------|---------|---------|---------|---------|---------|---------|---------|---------|
| Cortex               |         | +       |         |         | ++      |         |         |         |         |         |
| Basal Ganglia        |         |         |         |         |         |         |         |         |         |         |
| Cerebellum/Brainstem |         |         |         |         |         |         |         |         |         |         |
| Thalamus             |         |         |         |         |         |         |         | +       | +       |         |
| Amygdala             | +       |         | ++      | +++     | --      |         |         | ++      | +++     |         |
| Hippocampus          | +       |         |         |         | --      | -       |         | +       | ++      |         |

Non-negative matrix factorization "fingerprints:" different intensity profiles across regions (FDR  $q < .05$  :  $p = .0188$ )

| Set                  | ang-dis | ang-fea | ang-hap | ang-sad | dis-fea | dis-hap | dis-sad | fea-hap | fea-sad | hap-sad |
|----------------------|---------|---------|---------|---------|---------|---------|---------|---------|---------|---------|
| Cortex               | ***     |         | ***     | ***     | ***     |         | *       | ***     | ***     | *       |
| Basal Ganglia        |         |         | *       | *       | *       |         | *       |         |         |         |
| Cerebellum/Brainstem |         | ***     |         | **      |         |         |         |         |         |         |
| Thalamus             |         |         |         |         | **      | *       |         | *       | *       |         |
| Amygdala             | *       |         | **      | ***     | **      |         |         | ***     | ***     |         |
| Hippocampus          | **      | *       | **      |         | ***     | *       |         | **      | ***     | *       |

*Note.* Significant pairwise differences between emotion categories in overall average intensity of region groups/networks (top) and profiles across networks/regions within each group (bottom). Empty cells are non-significant. \*/ +/-  $P < .05$ . \*\*/++/--  $P < .01$ . \*\*\*/+++/--  $P < .001$ .
