# Supplementary material for: A Bayesian Model of Category-Specific Emotional Brain Responses
Source: PubMed Central journal article supplement (PMC4390279; doi:10.1371/journal.pcbi.1004066), 2015-04-08

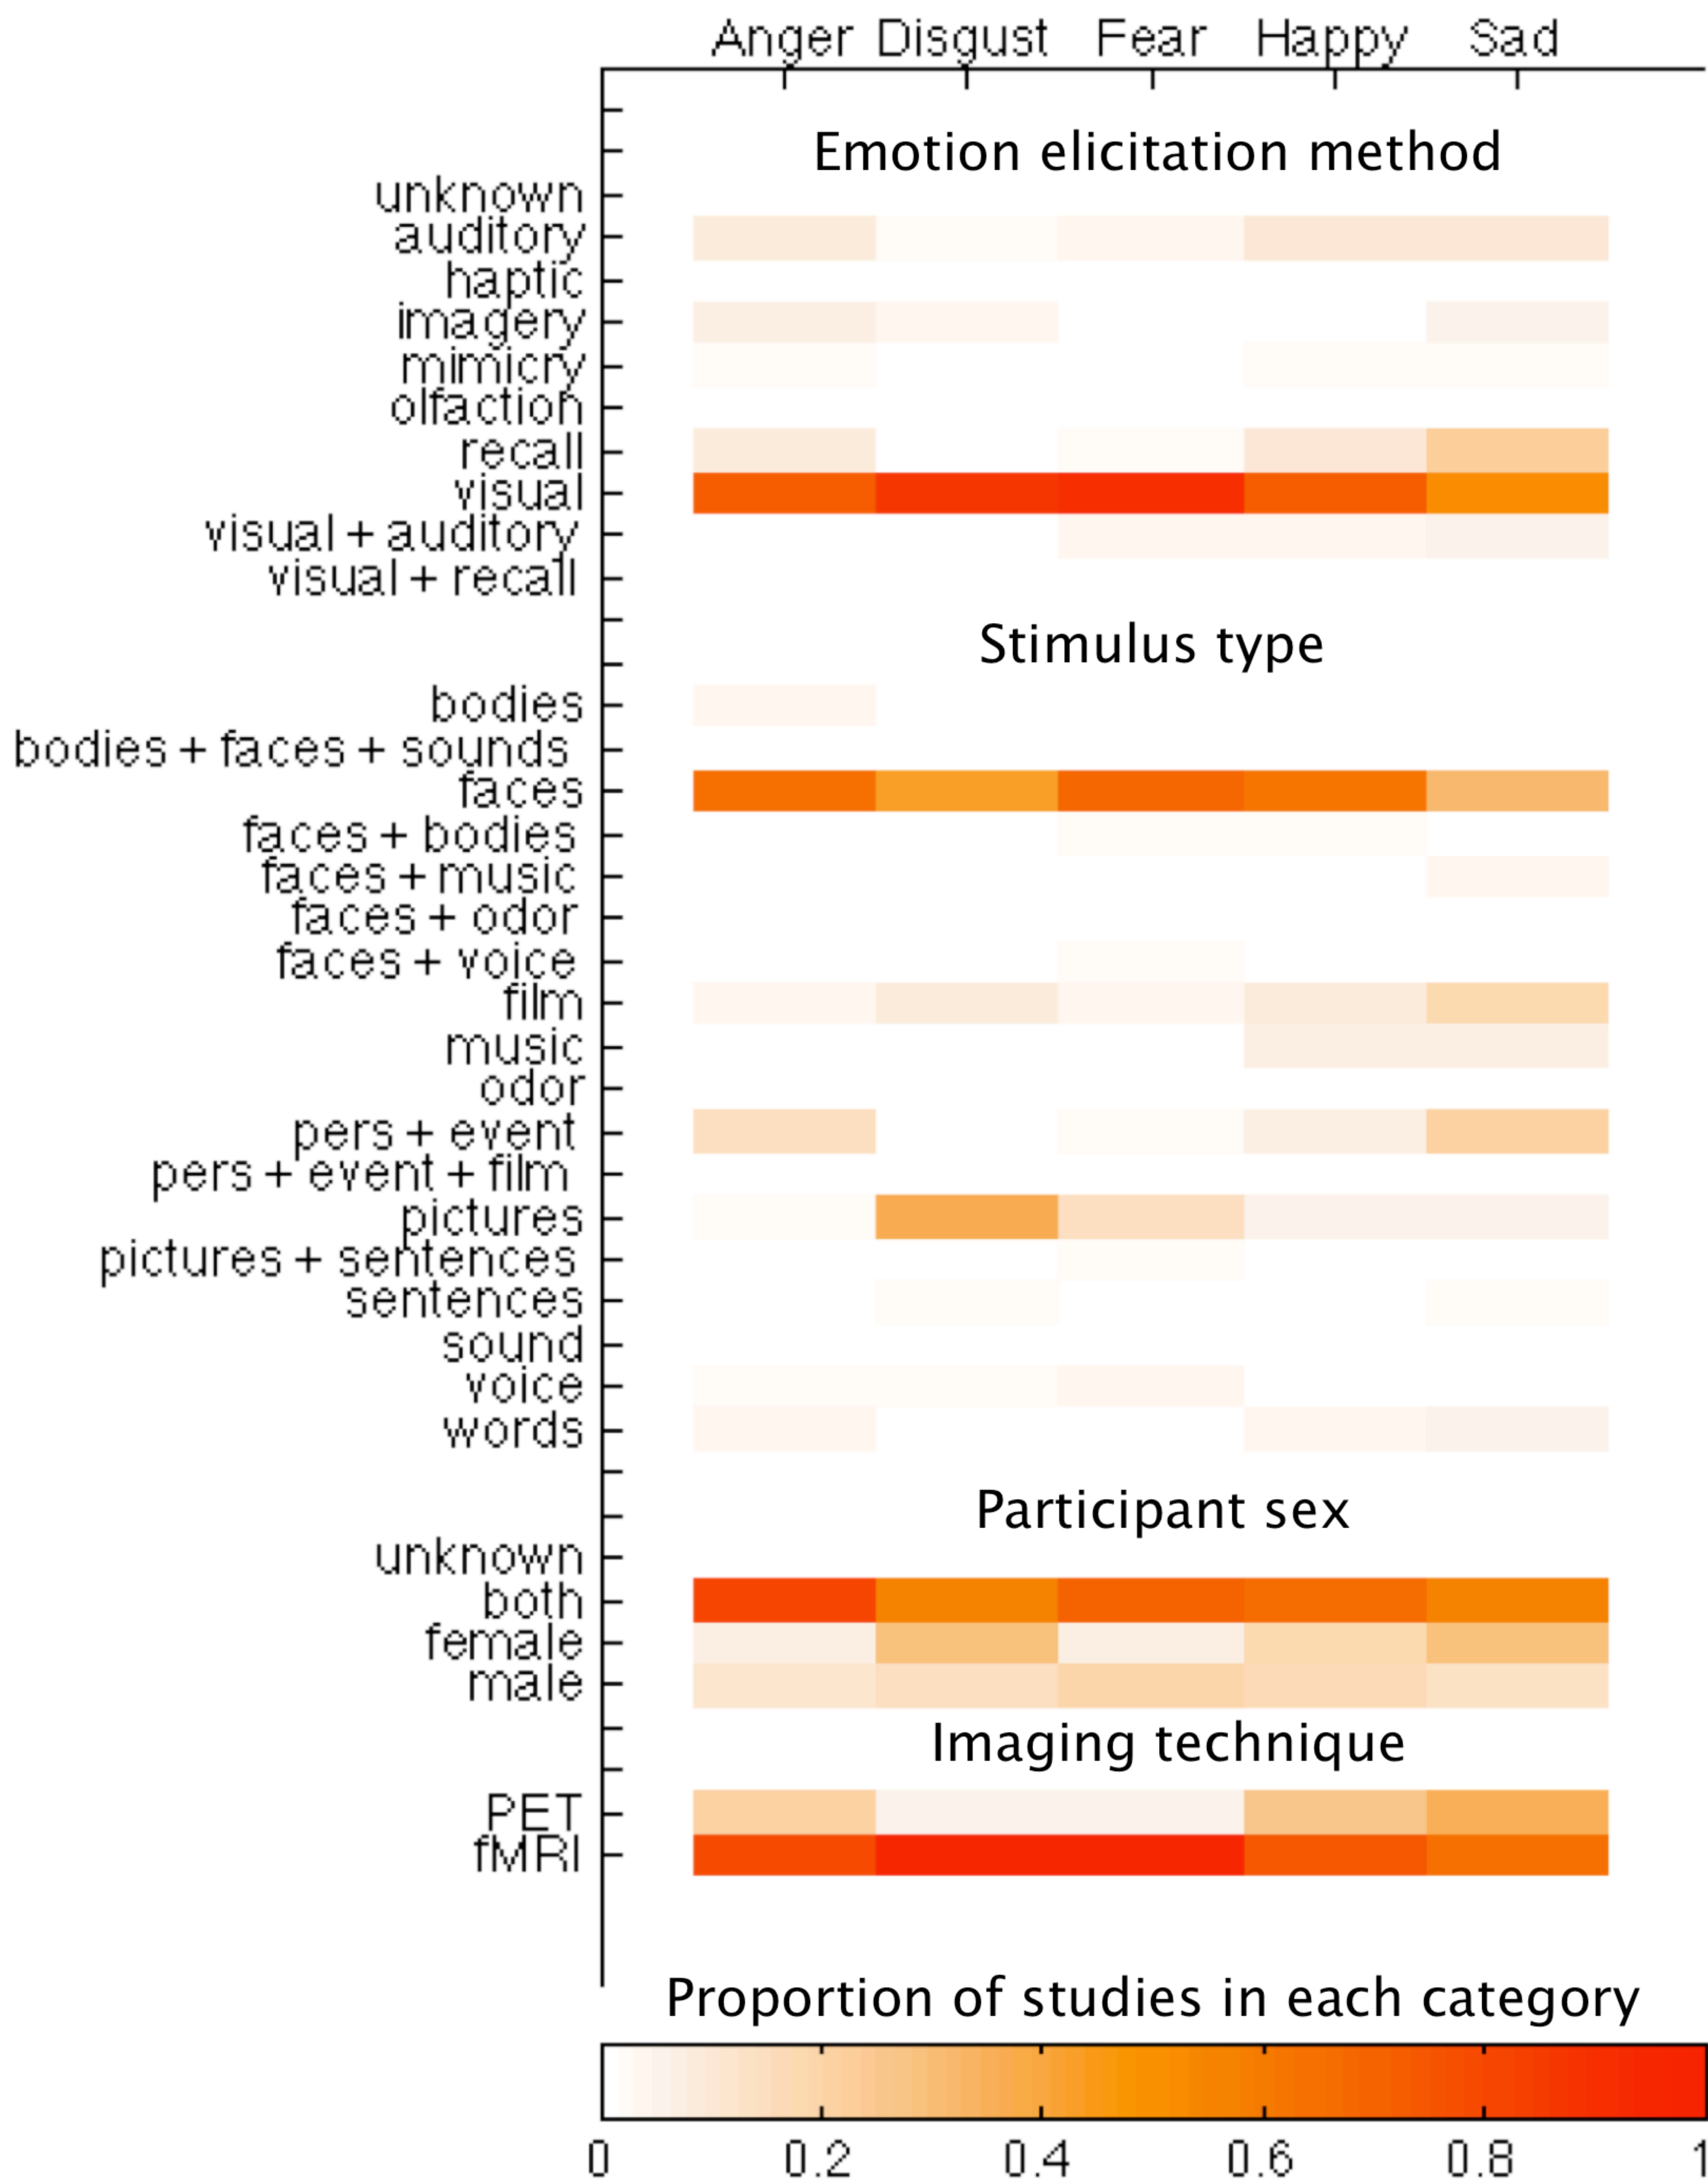

Supplement: pcbi.1004066.s005.pdf [file pcbi.1004066.s005.pdf]
