# Supplementary material for: A Bayesian Model of Category-Specific Emotional Brain Responses
Source: PubMed Central journal article supplement (PMC4390279; doi:10.1371/journal.pcbi.1004066), 2015-04-08

Supplementary Figure S5: Average within- and between-set correlations, and comparison with path length (global efficiency)

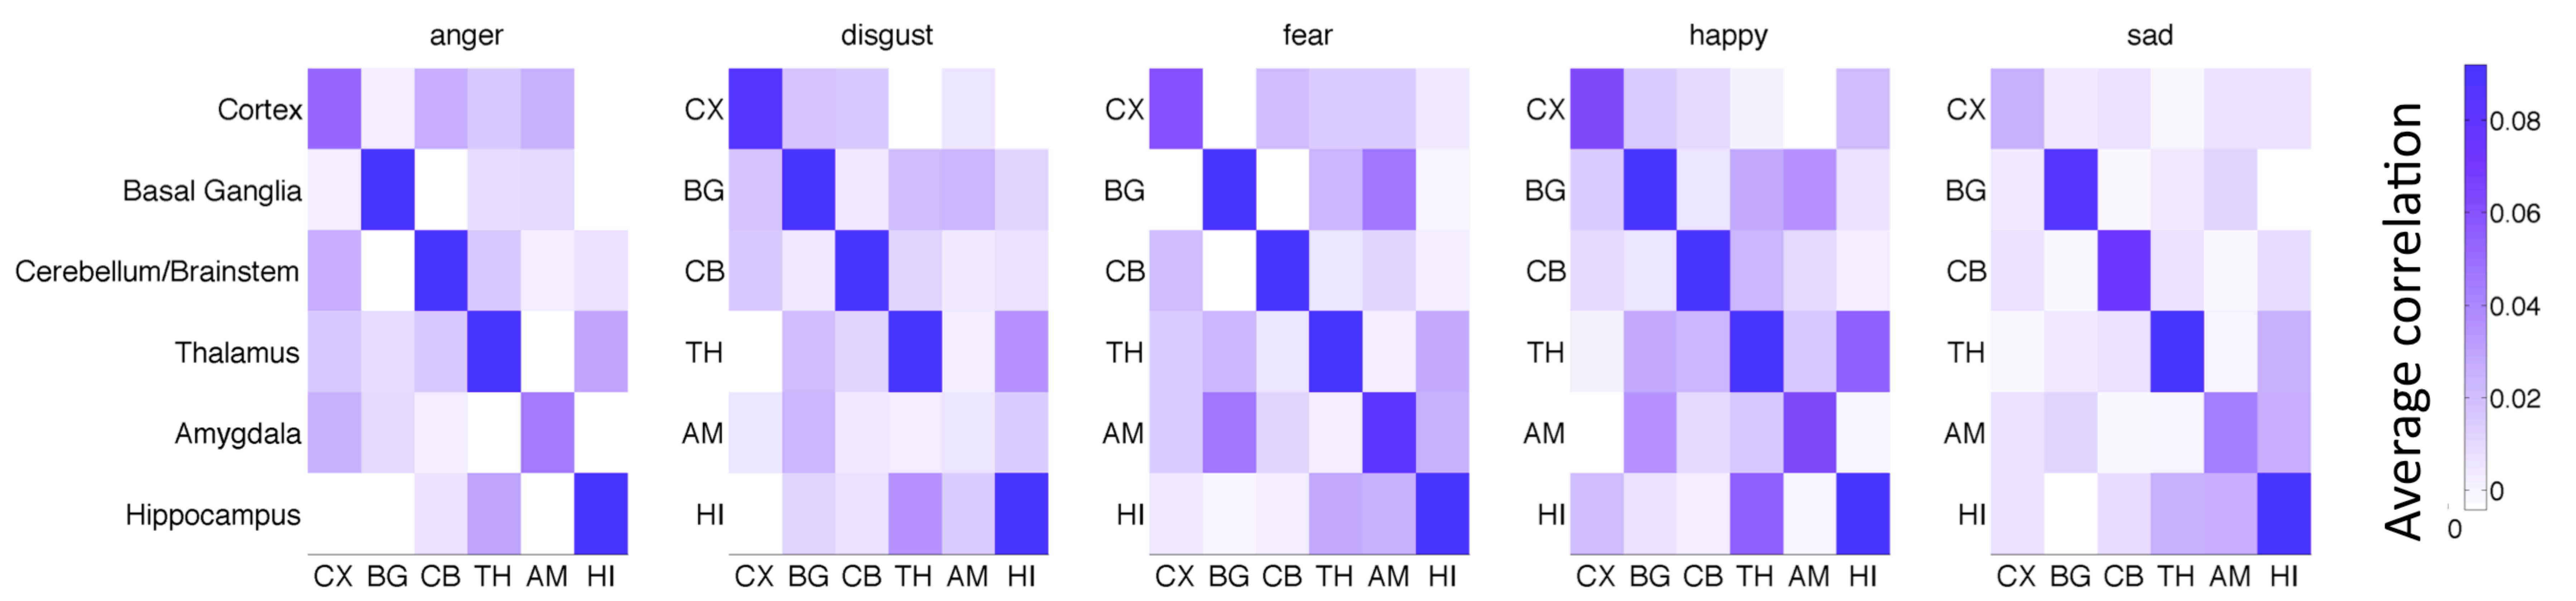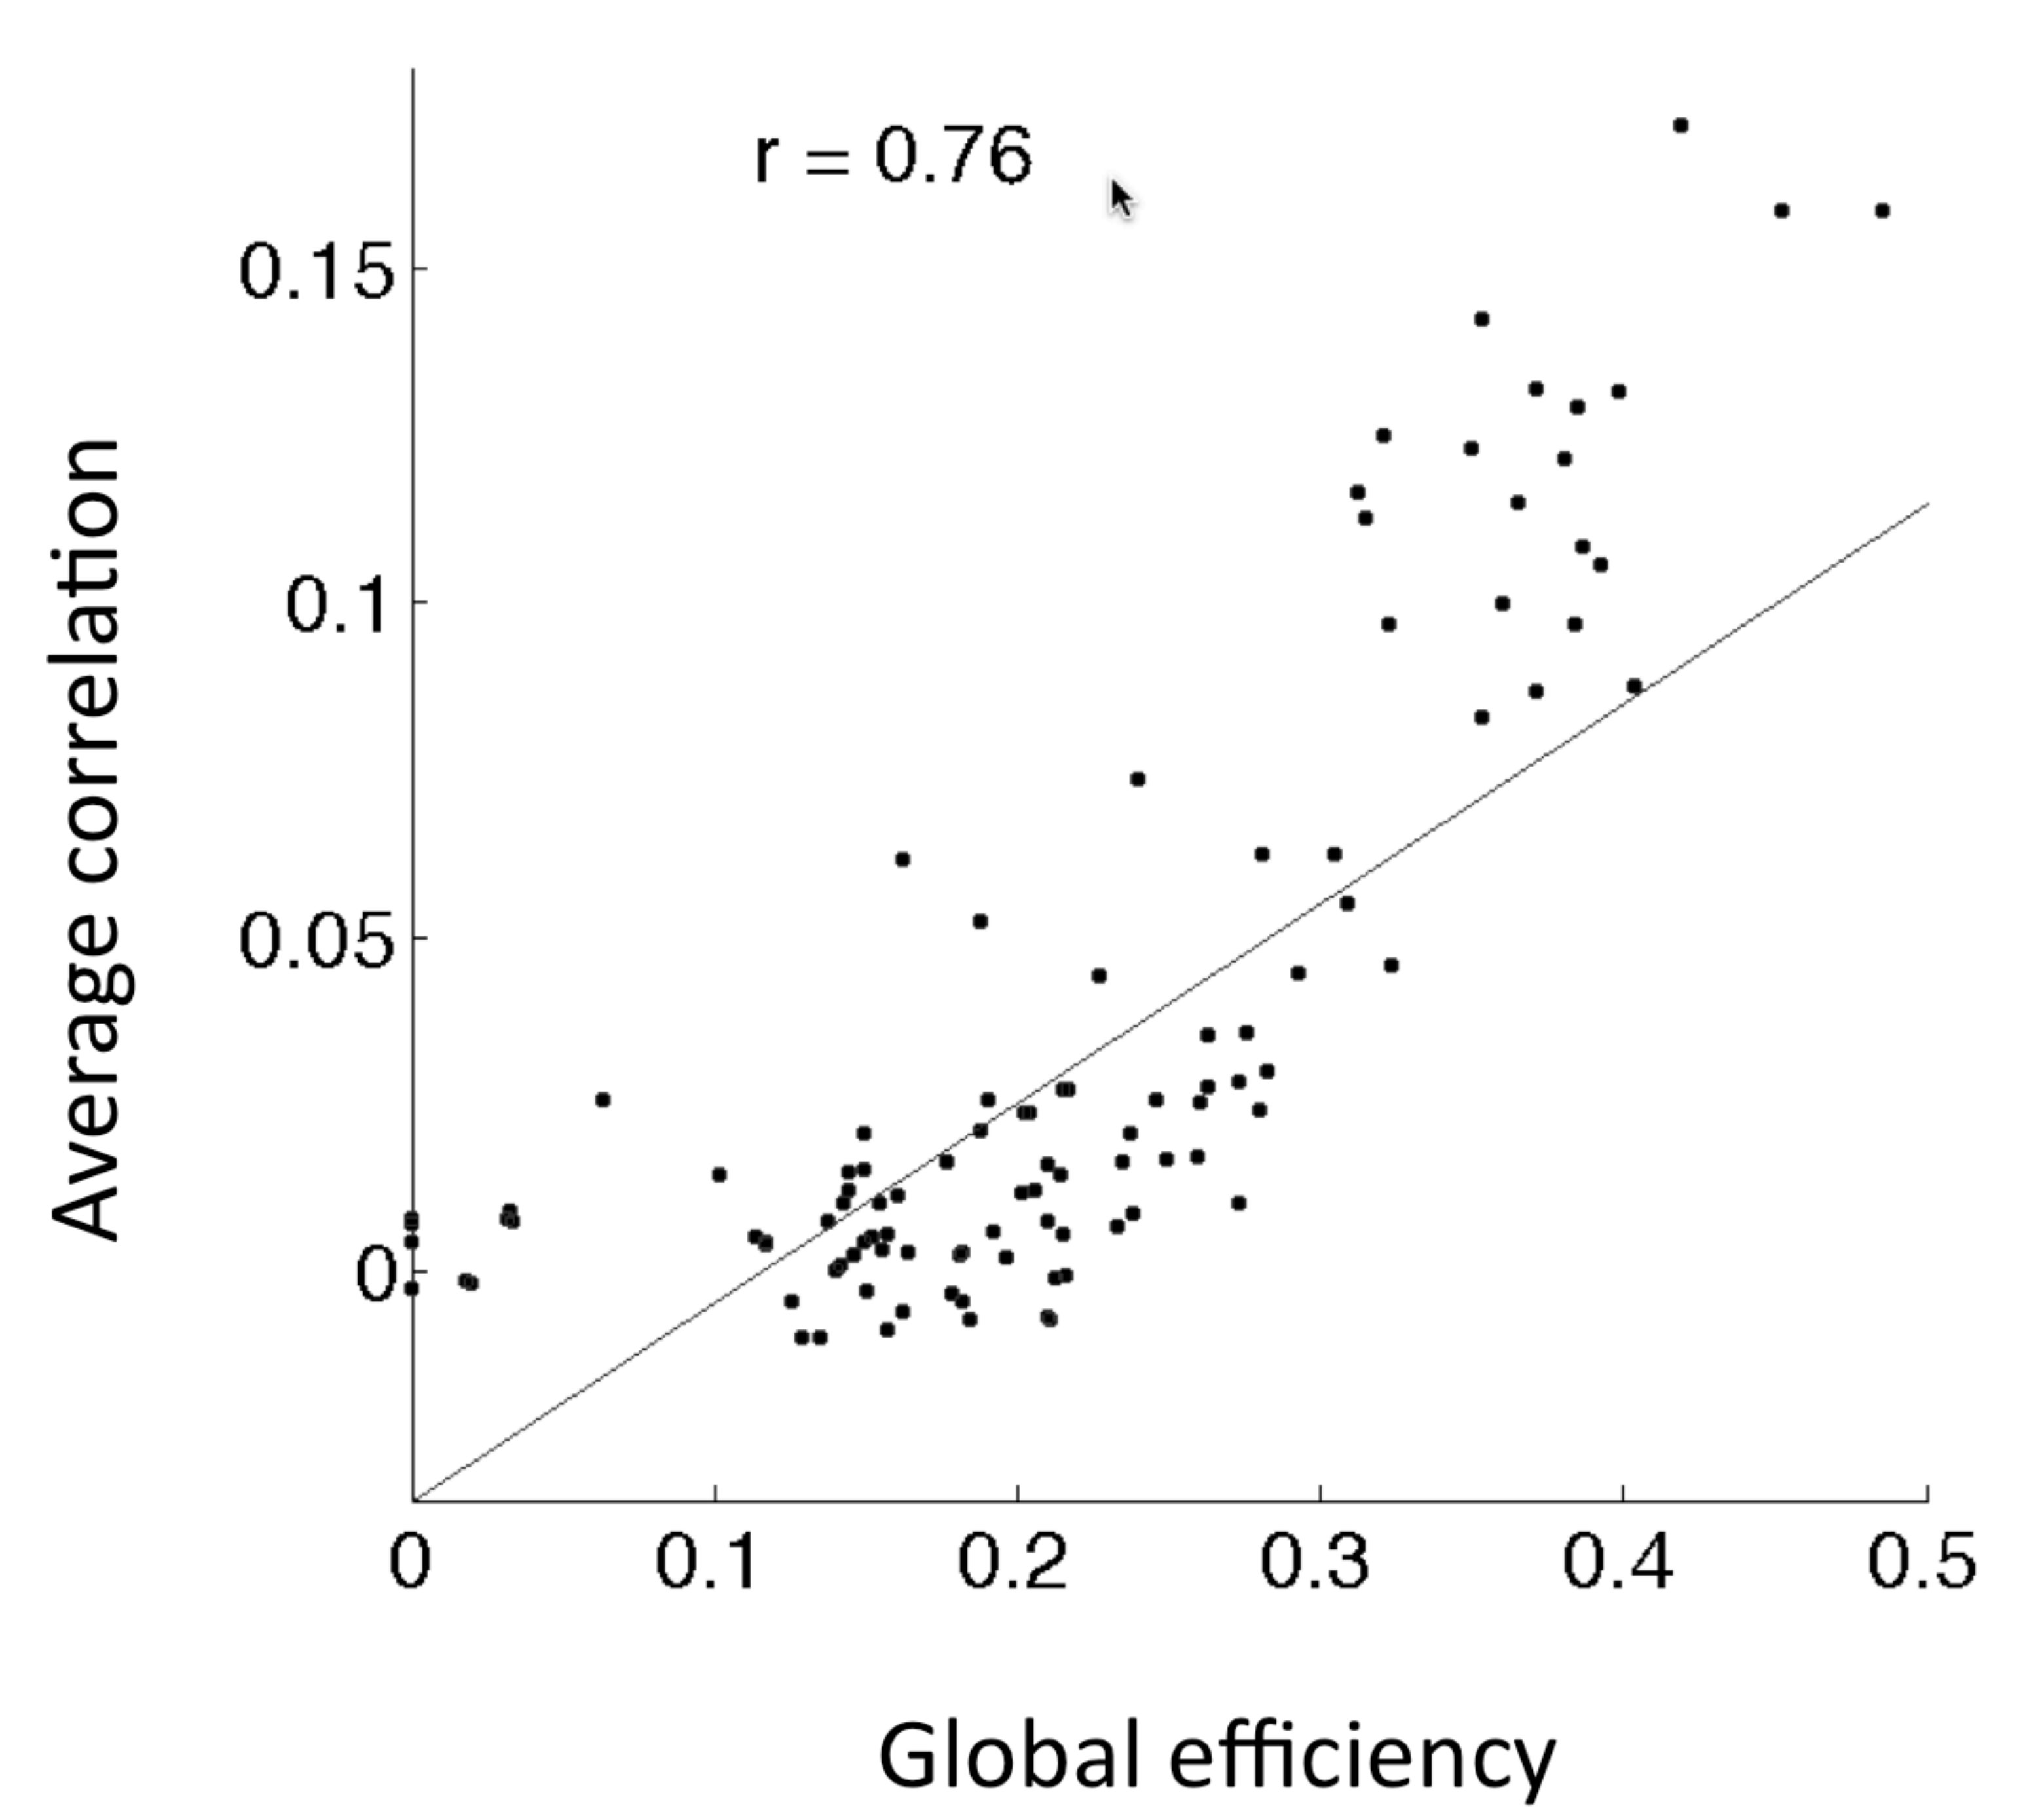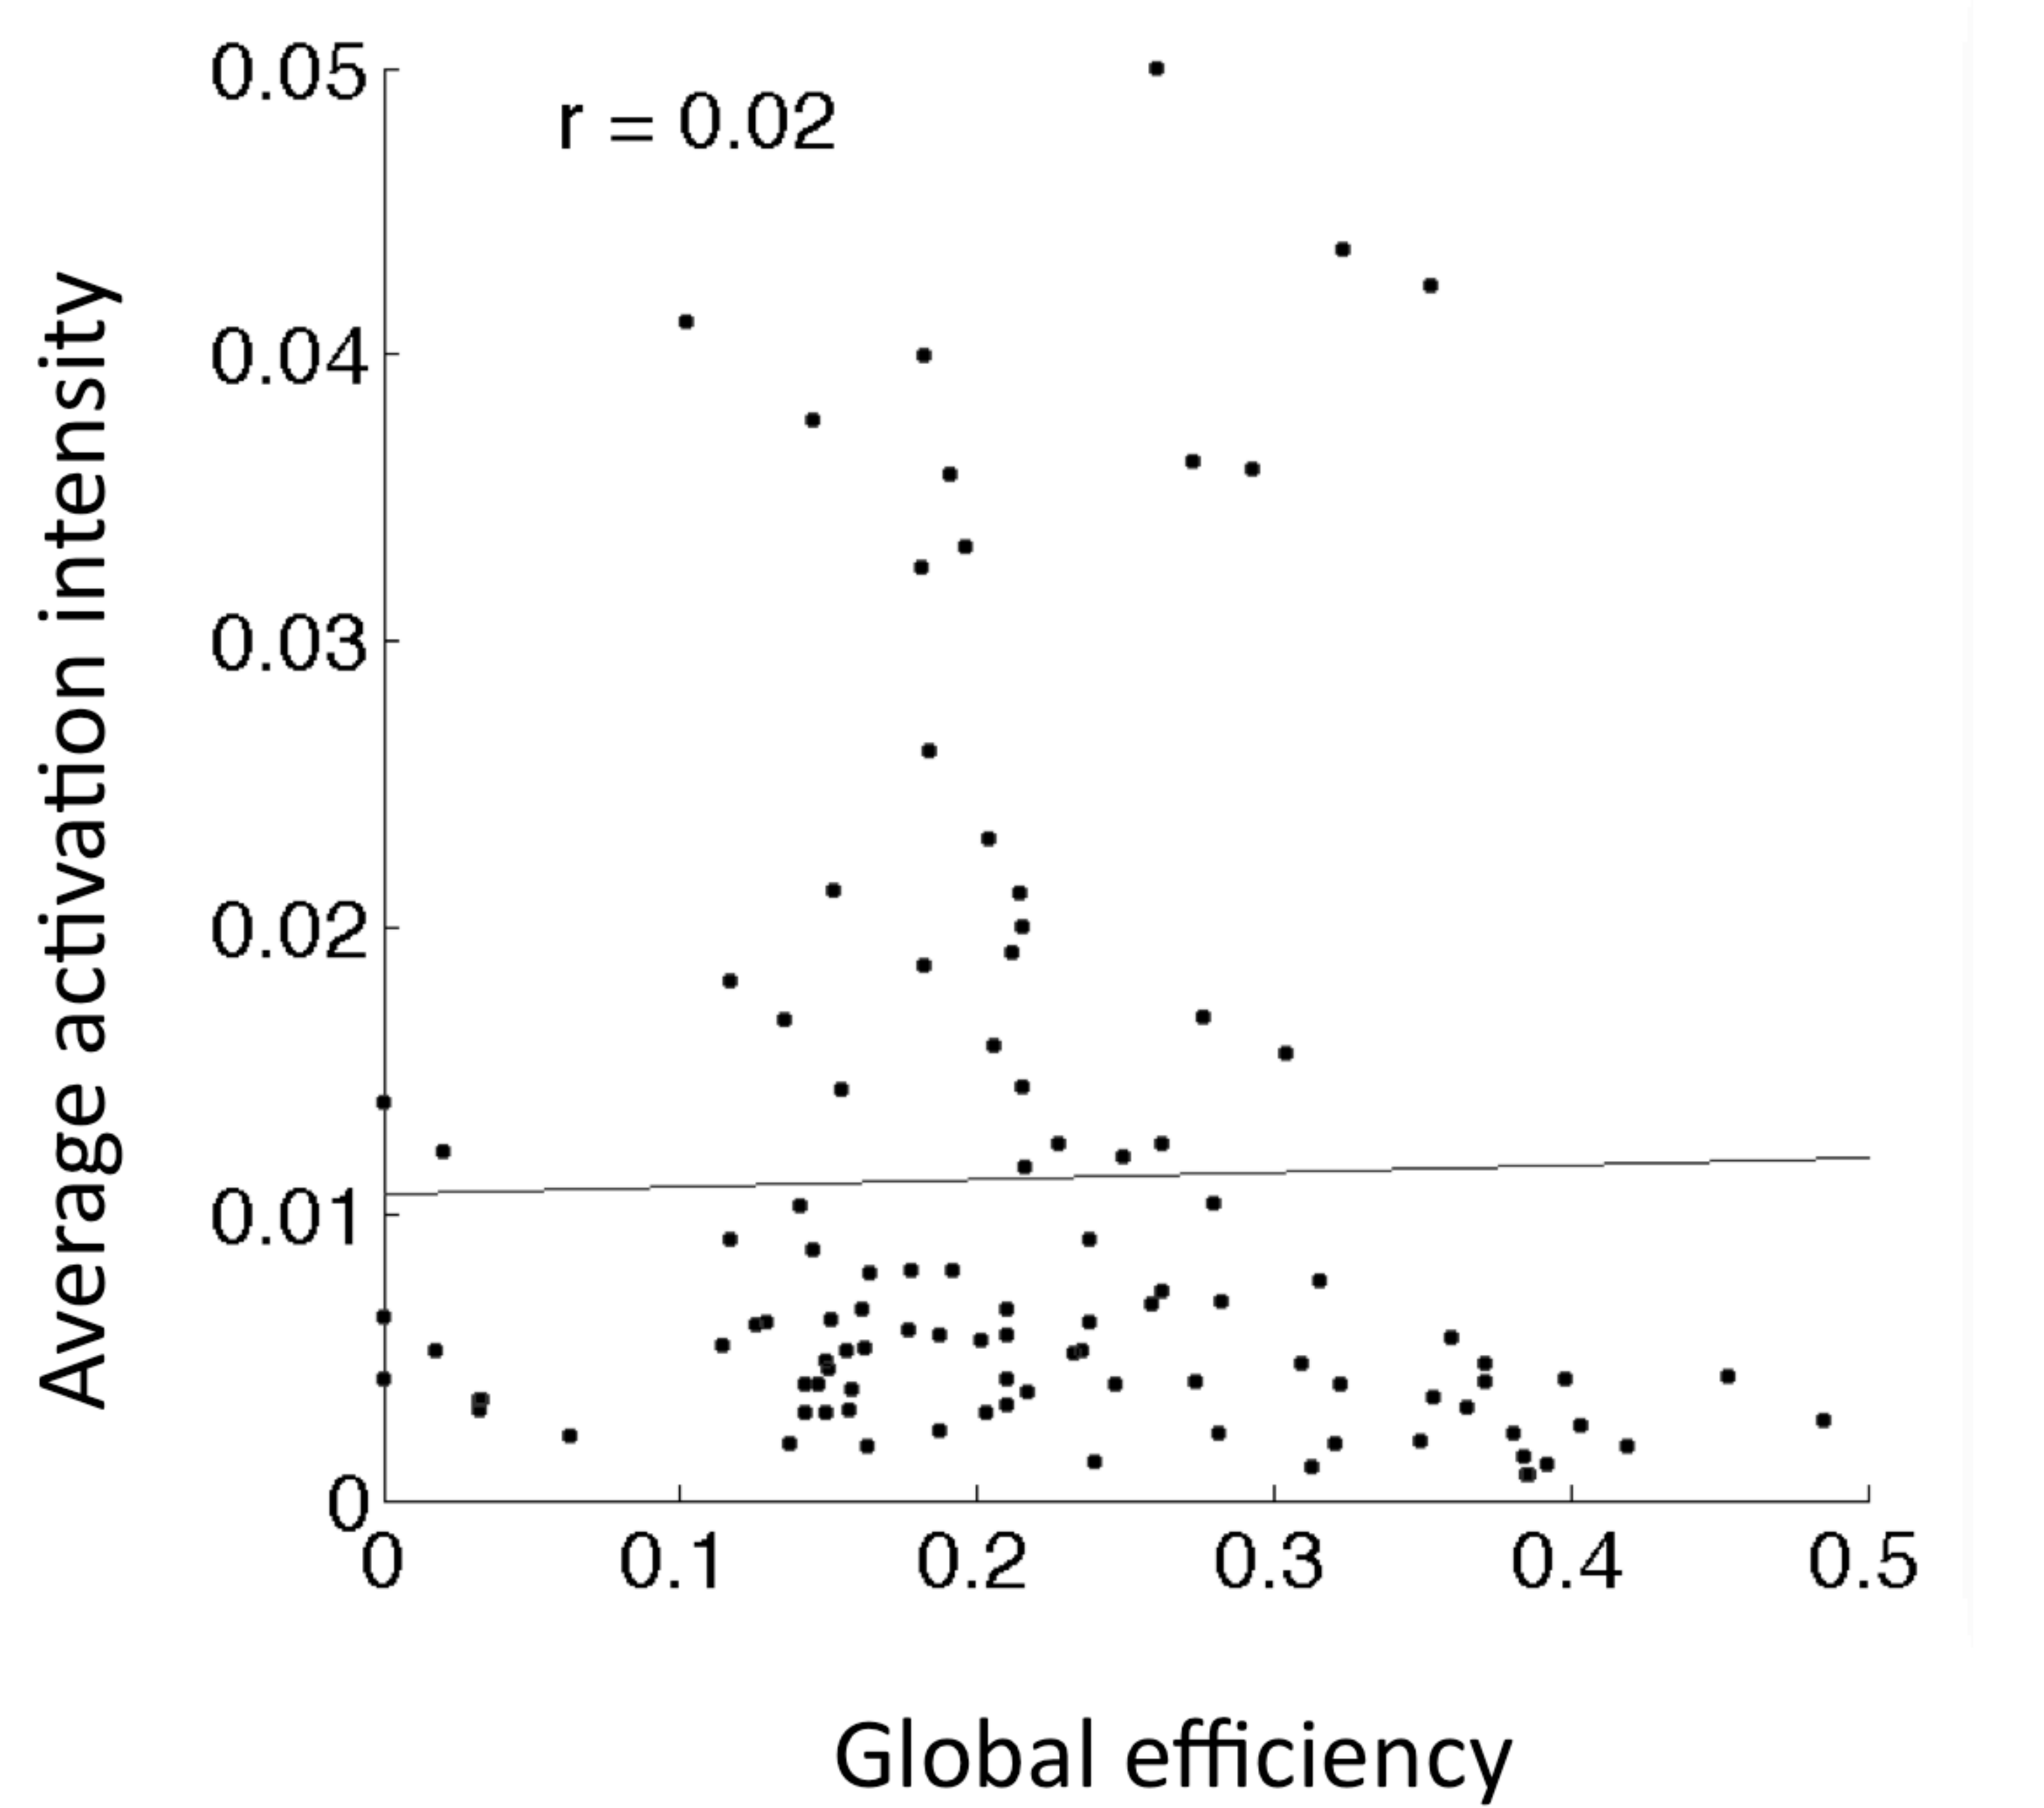

Supplement: pcbi.1004066.s009.pdf [file pcbi.1004066.s009.pdf]
